# Supplementary material for: Nitrogen-doped carbon nanotube as a potential metal-free catalyst for CO oxidation
Source: Royal Society of Chemistry journal article supplement (doi:10.1039/c6cp00162a), 2016-01-01
Supplement: c6cp00162a1.pdf [file c6cp00162a1.pdf]

## Supporting Information for

### Nitrogen-doped carbon nanotube as a potential metal-free catalyst for CO

#### oxidation

I-Hsiang Lin, Yu-Huan Lu, and Hsin-Tsung Chen \*

Department of Chemistry, Chung Yuan Christian University, Chungli District,

Taoyuan City, 32023, Taiwan

**Table S1.** Calculated adsorption energies (eV) and Bader charges ( $e$ ; in parentheses) of  $O_2$  species adsorbed on various sites of N-doped graphene.

| Materials\site | C-N           | C-C-1        | C-C-2 |
|----------------|---------------|--------------|-------|
| N-graphene     | -0.38 (-0.28) | 0.50 (-1.10) | 0.91  |

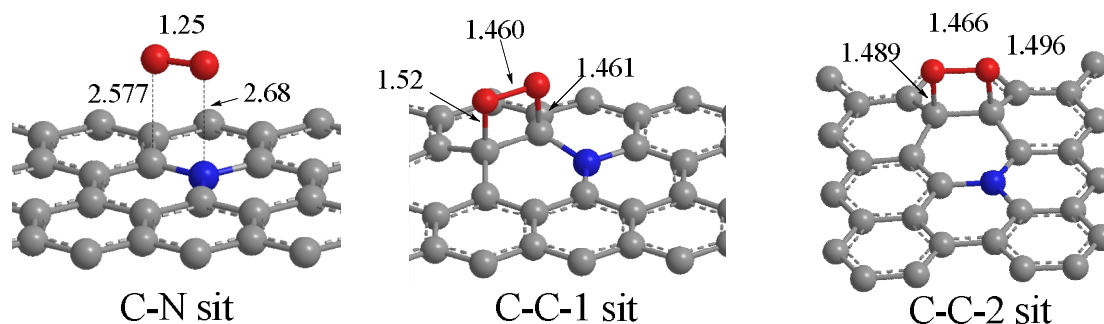

**Figure S1.** Optimized structures of  $O_2$  adsorption on N-doped graphene. Gray, blue, and red spheres represent C, N, and O, atoms, respectively.

## **Oxygen reduction reaction (ORR) processes on C–C-1 site of N-doped carbon materials and O<sub>2</sub> diffusion from C–N site to C–C-1 site on the N-doped carbon materials**

We also studied the oxygen reduction reaction (ORR) process on the C–C-1 site of (3, 3)-NCNT, (4, 4)-NCNT, and (5, 5)-NCNT. As shown in Figure S2, gas-phase O<sub>2</sub> molecule is placed at the C–C-1 site with the distance of  $\sim 4.0$  Å as the reactant. The NEB calculation reveals that this process needs to overcome a significant activation energy barrier of 0.42, 0.13, and 0.52 eV to be adsorbed and reduced on the C-C-1 site for (3, 3)-, (4, 4)-, and (5, 5)-NCNTs.

We also investigated the O<sub>2</sub> diffusion from C–N site to C–C-1 site on the N-doped carbon nanotubes and the minimum energy path of this process has been depicted in Figure S3. The diffusion barriers of this process are predicted to be 0.04, 0.25, and 0.49 eV for (3, 3)-, (4, 4)-, and (5, 5)-NCNTs, respectively.

As a comparison, there is no energy barrier in the minimum energy paths for ORR on the C–N sites and the O<sub>2</sub> diffusion from C–N site to C–C-1 site needs to overcome energy barriers. Therefore, we rule out the possibility of CO oxidation process on the C–C-1 site. However, the calculation results for CO oxidation on the C–C-1 site are still discussed and presented in Supporting Information (Figures S7~S9).

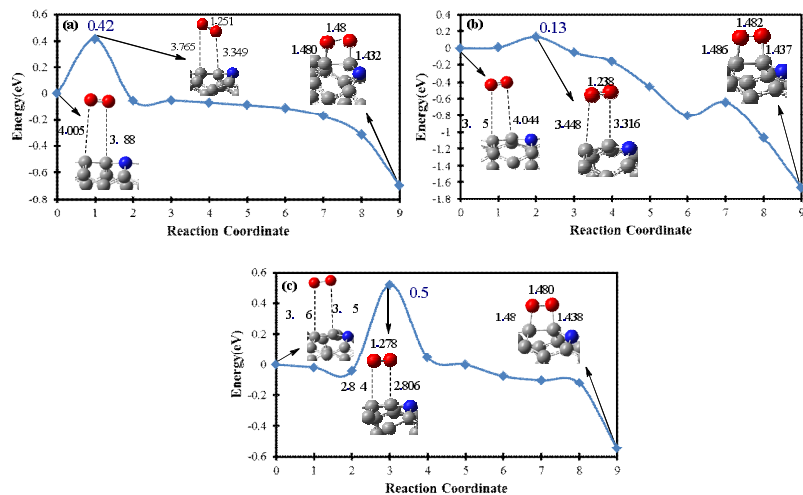

**Figure S2.** Calculated minimum energy paths of O<sub>2</sub> adsorption and reduction on the C–C-1 sites of (a) (3, 3)-NCNT, (b) (4, 4)-NCNT, and (c) (5, 5)-NCNT.

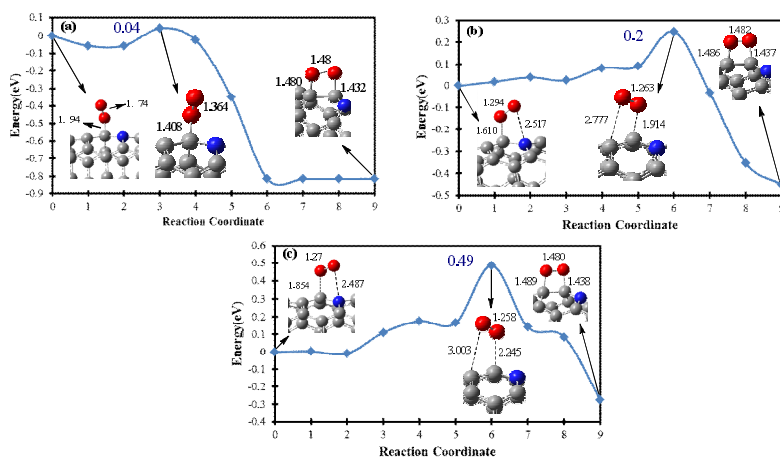

**Figure S3.** Calculated minimum energy paths of O<sub>2</sub> diffusion from C–N site to C–C-1 site on (a) (3, 3)-NCNT, (b) (4, 4)-NCNT, and (c) (5, 5)-NCNT.

### Ab initio molecular dynamic (ABMD) trajectory of O<sub>2</sub> reduction reaction process

Similarly to the case of (3, 3)-NCNT, O<sub>2</sub> molecule is placed on the top of the C–N site with a distance of 3.5~4.0 Å. An obvious drop in the beginning of the potential energy in the interval of 0 ~ 144 fs and 0 ~ 86 fs for the case of (4, 4)- and (5, 5)-NCNTs, respectively, see Figure S4. In this time interval, O<sub>2</sub> molecule gradually approaches and binds to the C–N site via the end-on configuration of O<sub>2</sub> adsorption. Then the O<sub>2</sub> diffusion from the C–N site to the C–C-1 site with side-on configuration takes place in the time-step interval of 156 ~ 478 fs and 86 ~ 500 fs for (4, 4)- and (5, 5)-NCNTs accompanying a hill at 144 and 134 fs in the energy profile.

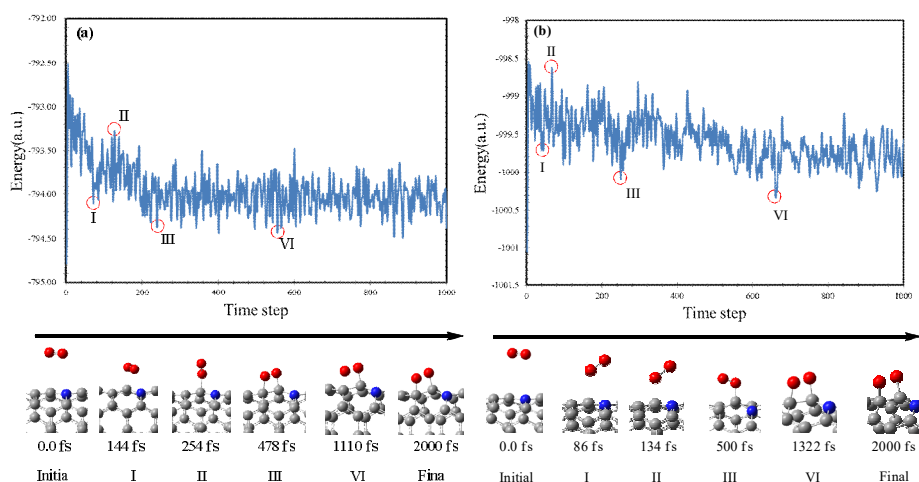

**Figure S4.** Ab initio molecular dynamic (ABMD) trajectory of O<sub>2</sub> reduction reaction process with some snapshots of intermediate at different times: (a) (4, 4)-NCNT and (b) (5, 5)-NCNT.

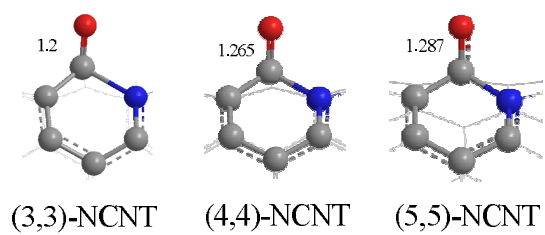

**Figure S5.** Optimized structures of O adsorption on (3, 3)-, (4, 4)-, and (5, 5)-NCNTs.

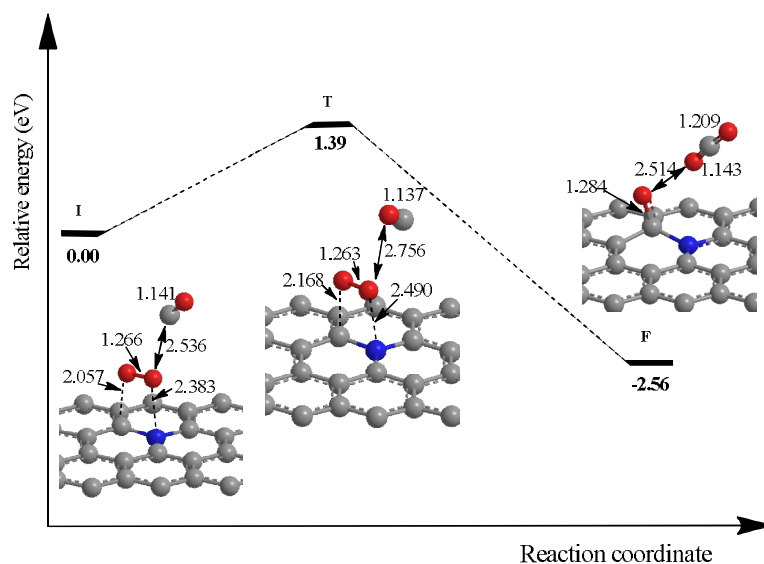

**Figure S6.** Optimized structures of initial states (reactants), transition states, and final states (products) for CO oxidation on C–N site of N-doped graphene and the related energy diagrams of CO oxidation reaction.

### **CO oxidation reaction processes on C–C-1 site of N-doped carbon nanotubes.**

We also studied the CO oxidation processes on the C–C-1 site. This reaction starts from the CO and O<sub>2</sub> co-adsorption (initial state) in which the O<sub>2</sub> is adsorbed at C-C-1 site via the side-on configuration. The CO and O<sub>2</sub> co-adsorption energy is computed to be –1.63, –1.04, –0.62 and 0.49 eV for (3, 3)-, (4, 4)-, (5, 5)-NCNTs, and N-doped graphene, respectively, which are slightly higher than those of O<sub>2</sub> side-on adsorption. As showed in Figures S7 and S9, the distance between C<sub>CO</sub> and 1O is predicted to be 4.401, 3.853, 3.910, and 2.786 Å for (3, 3)-, (4, 4)-, (5, 5)-NCNTs, and N-doped graphene, respectively. The bond length of C–O in CO and O–O in O<sub>2</sub> is predicted in the range of 1.135 ~ 1.137 and 1.460 ~ 1.489 Å. As depicted in Figure S8, CO starts moving to approach the side-on adsorbed O<sub>2</sub> and active the adsorbed O<sub>2</sub> at the transition state, TS1. The O–O bond distance is lengthened to 2.745, 3.018, 2.701, and 1.791 Å in the TS1 for (3, 3)-, (4, 4)-, (5, 5)-NCNTs, and N-doped graphene, respectively, indicating the dissociation of the O–O bond of the O<sub>2</sub> adsorbed to two O atoms adsorbed on the NCNTs. The calculated barrier at TS1 for this step is 0.04, 0.12, 0.15, and 1.99 eV for (3, 3)-, (4, 4)-, (5, 5)-NCNTs, and N-doped graphene, respectively. The process continues to generate a carbonate-like intermediate (MS) with an exothermicity of 5.36, 5.23, 5.14 and 4.31 eV. The C<sub>CO</sub>–O<sub>CO</sub>, C–O<sub>1O</sub>, and C–O<sub>2O</sub> bond length in MS are 1.260, 1.275, and 1.270 Å for N-doped graphene. Those are 1.190, 1.369, 1.353, and 1.194, 1.365, 1.347 and 1.191, 1.364, 1.347 Å for the case of (3, 3)-, (4, 4)- and (5, 5)-NCNTs. The final state including CO<sub>2</sub> and adsorbed O atom is produced from MS by overcoming a very high barrier of 1.56, 1.35, 1.36, and 0.83 eV for (3, 3)-, (4, 4)-, (5, 5)-NCNTs and N-doped graphene. In the TS2, the cleavage of C<sub>co</sub>–O<sub>1O</sub> and C<sub>2C</sub>–O<sub>2O</sub> bonds increases to 1.519 ~ 2.072 and 2.252 ~ 2.642

Å while the  $C_{1C}-O_{1O}$  bond decreases to  $1.161 \sim 1.238$  Å. The overall reaction is predicted to be exothermic by 3.85, 3.90, 3.93, and 4.66 eV for (3, 3)-, (4, 4)-, (5, 5)-NCNTs, and N-doped graphene, respectively. The desorption of  $CO_2$  molecule from FS is easy to occurs due to the small adsorption energy (The adsorption energy of  $CO_2$  is calculated to be  $-0.04$ ,  $-0.03$ , and  $0.01$  eV for (3, 3)-, (4, 4)-, and (5, 5)-NCNTs, respectively).





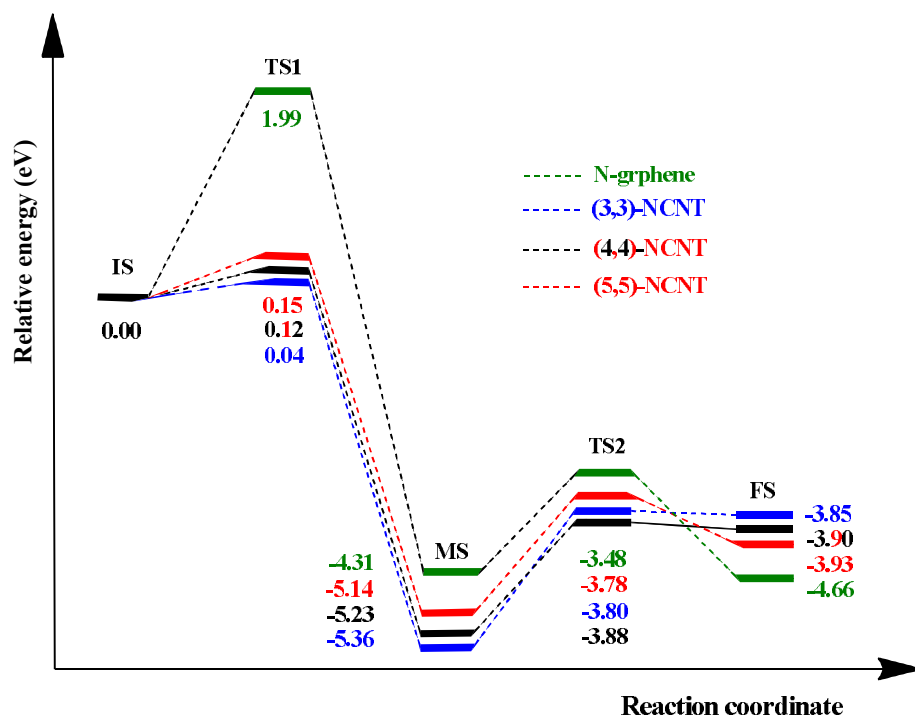

**Figure S8.** Energy diagrams of CO oxidation reaction on C–C-1 site of (3, 3)-, (4, 4)-, (5, 5)-NCNTs, and N-doped graphene.
